# Supplementary material for: Genome-wide expanding of genetic evolution and potential pathogenicity in Vibrio alginolyticus
Source: PubMed Central journal article supplement — Emerg Microbes Infect. 2024 Apr 30;13(1):2350164. doi: 10.1080/22221751.2024.2350164 (PMC11132748; doi:10.1080/22221751.2024.2350164), 2024-04-30
Supplement: TEMI_A_2350164_SM3476.pdf [file TEMI_A_2350164_SM3476.pdf]

1 Supplementary File

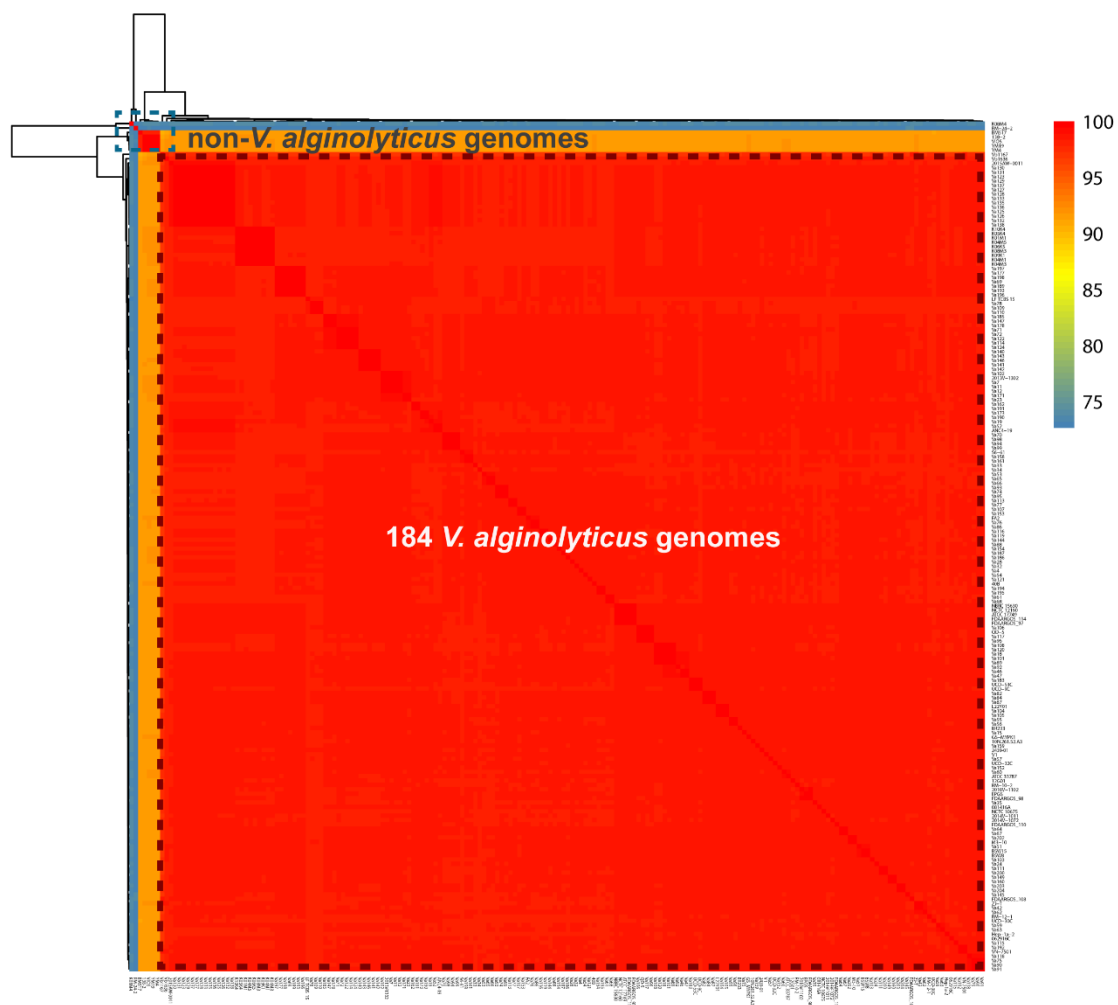

2

3 **Fig. S1** Average nucleotide identity (ANI) values for the whole genomic sequences of  
4 the 194 suspected *V. alginolyticus* genomes (included 133 laboratory isolates and 61  
5 NCBI-derived genomes). Compared with the species boundaries of 95%, 184 *V.*  
6 *alginolyticus* genomes were prepared for the subsequent analysis.

7  
8  
9  
10  
11  
12  
13  
14  
15  
16  
17

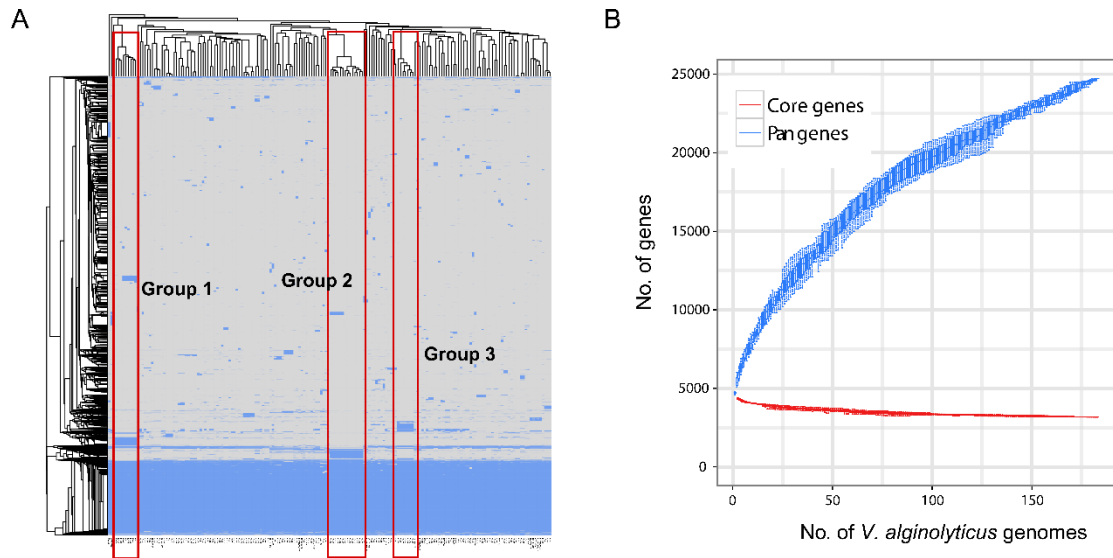

18

19 **Fig. S2** Pan-genome analysis of *V. alginolyticus* population. (A) Pan-genome clustering  
 20 heatmap of 184 *V. alginolyticus* strains. The clustering of pan genes is on the left, and  
 21 the clustering of strains is on the top. The color blue and gray represent the presence  
 22 and absence of genes, respectively. (B) Dilution curve of core- and pan- genes among  
 23 these *V. alginolyticus* strains.

24

25

26

27



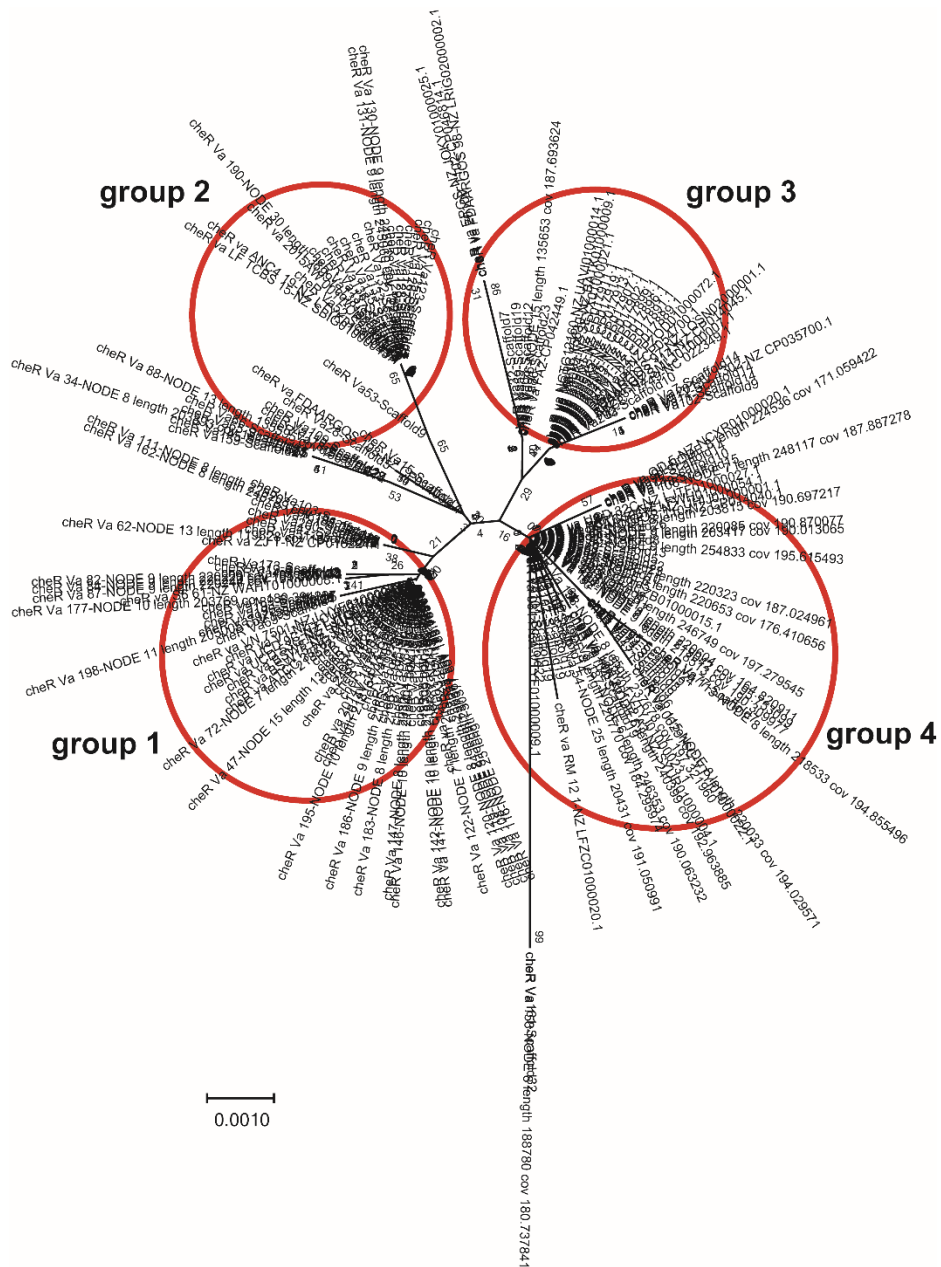

35

36 **Fig. S4** The NJ-tree of the *cheR* gene sequences among 184 *V. alginolyticus* genomes,  
 37 which are approximately classified into 4 groups. Groups 1 to 4 are highlighted with  
 38 red circles. The horizontal bar, 0.001 estimated nucleotide substitutions per site.

**TABLE S1** Detailed information of *Vibrio alginolyticus* analyzed in this study

| No. | Strain | Original strain No. | Year | Source              | Geography       |
|-----|--------|---------------------|------|---------------------|-----------------|
| 1   | Va4    | rong7               | 2008 | Frozen squid        | Liaoning, China |
| 2   | Va7    | C1111165            | 2011 | Frozen shrimp       | Liaoning, China |
| 3   | Va11   | DDV062              | 2013 | Frozen shrimp       | Liaoning, China |
| 4   | Va12   | DDV064              | 2012 | Ribbonfish, seafood | Liaoning, China |
| 5   | Va15   | BR1                 | 2014 | Freshwater          | Henan, China    |
| 6   | Va18   | ER4                 | 2014 | Freshwater          | Henan, China    |
| 7   | Va19   | FR5                 | 2014 | Fresh sea fish      | Henan, China    |
| 8   | Va23   | IR9                 | 2014 | Stale sea fish      | Henan, China    |
| 9   | Va24   | JR10                | 2014 | Fresh fish          | Henan, China    |
| 10  | Va28   | KR15                | 2014 | Freshwater          | Henan, China    |
| 11  | Va32   | PR19                | 2014 | Stale sea fish      | Henan, China    |
| 12  | Va33   | DR20                | 2014 | Fresh fish          | Henan, China    |
| 13  | Va34   | HR21                | 2014 | Stale fish          | Henan, China    |
| 14  | Va35   | KR22                | 2014 | Freshwater          | Henan, China    |
| 15  | Va42   | KR29                | 2014 | Freshwater          | Henan, China    |
| 16  | Va46   | VaTJHX3-01          | 2015 | Clam, seafood       | Tianjin, China  |
| 17  | Va47   | VaTJHX3-02          | 2015 | Clam, seafood       | Tianjin, China  |
| 18  | Va51   | VaTJHX6-01          | 2015 | Clam, seafood       | Tianjin, China  |
| 19  | Va52   | VaTJHX8-01          | 2015 | Clam, seafood       | Tianjin, China  |
| 20  | Va53   | VaTJHX9-01          | 2015 | Clam, seafood       | Tianjin, China  |
| 21  | Va54   | VaTJHX9-02          | 2015 | Clam, seafood       | Tianjin, China  |
| 22  | Va55   | VaTJHX11-01         | 2015 | Clam, seafood       | Tianjin, China  |
| 23  | Va56   | VaTJHX11-02         | 2015 | Clam, seafood       | Tianjin, China  |
| 24  | Va57   | VaTJHX12-01         | 2015 | Clam, seafood       | Tianjin, China  |
| 25  | Va59   | VaTJHX14-01         | 2015 | Clam, seafood       | Tianjin, China  |
| 26  | Va60   | VaTJHX20-01         | 2015 | Clam, seafood       | Tianjin, China  |
| 27  | Va61   | VaTJHX20-02         | 2015 | Clam, seafood       | Tianjin, China  |

|    |      |             |      |               |                       |
|----|------|-------------|------|---------------|-----------------------|
| 28 | Va62 | VaTJHX20-03 | 2015 | Clam, seafood | Tianjin, China        |
| 29 | Va63 | VaTJHX21-01 | 2015 | Clam, seafood | Tianjin, China        |
| 30 | Va64 | 003-001     | 2005 | Seawater      | East China Sea, China |
| 31 | Va65 | 004-002     | 2005 | Seawater      | East China Sea, China |
| 32 | Va66 | 008-001     | 2005 | Seawater      | East China Sea, China |
| 33 | Va67 | 009-008     | 2005 | Seawater      | East China Sea, China |
| 34 | Va68 | 010-004     | 2005 | Seawater      | East China Sea, China |
| 35 | Va69 | 012-004     | 2005 | Seawater      | East China Sea, China |
| 36 | Va70 | 014-606     | 2005 | Seawater      | East China Sea, China |
| 37 | Va71 | 025-003     | 2005 | Seawater      | East China Sea, China |
| 38 | Va72 | 028-001-2   | 2006 | Seawater      | Bohai Sea, China      |
| 39 | Va74 | 028-003     | 2006 | Seawater      | Bohai Sea, China      |
| 40 | Va75 | 029-001     | 2006 | Seawater      | Bohai Sea, China      |
| 41 | Va76 | 030-001     | 2006 | Seawater      | Bohai Sea, China      |
| 42 | Va77 | 030-002     | 2006 | Seawater      | Bohai Sea, China      |
| 43 | Va78 | 031-001     | 2006 | Seawater      | Bohai Sea, China      |
| 44 | Va82 | 032-002     | 2006 | Seawater      | Bohai Sea, China      |
| 45 | Va84 | 032-003     | 2006 | Seawater      | Bohai Sea, China      |
| 46 | Va86 | 033-003     | 2006 | Seawater      | Bohai Sea, China      |
| 47 | Va87 | 034-003     | 2006 | Seawater      | Bohai Sea, China      |
| 48 | Va88 | 035-001     | 2006 | Seawater      | Bohai Sea, China      |
| 49 | Va89 | 035-002     | 2006 | Seawater      | Bohai Sea, China      |
| 50 | Va90 | 035-004     | 2006 | Seawater      | Bohai Sea, China      |
| 51 | Va91 | 036-001     | 2006 | Seawater      | Bohai Sea, China      |
| 52 | Va92 | 036-001-3   | 2006 | Seawater      | Bohai Sea, China      |
| 53 | Va93 | 036-002     | 2006 | Seawater      | Bohai Sea, China      |
| 54 | Va94 | 037-003     | 2006 | Seawater      | Bohai Sea, China      |
| 55 | Va95 | 038-001     | 2006 | Seawater      | Bohai Sea, China      |
| 56 | Va96 | 038-002     | 2006 | Seawater      | Bohai Sea, China      |

|    |       |           |      |          |                        |
|----|-------|-----------|------|----------|------------------------|
| 57 | Va98  | 039-001   | 2006 | Seawater | Bohai Sea, China       |
| 58 | Va99  | 041-002   | 2006 | Seawater | Bohai Sea, China       |
| 59 | Va101 | 041-004   | 2006 | Seawater | Bohai Sea, China       |
| 60 | Va102 | 043-004   | 2006 | Seawater | Bohai Sea, China       |
| 61 | Va103 | 044-004   | 2006 | Seawater | Bohai Sea, China       |
| 62 | Va104 | 044-004   | 2006 | Seawater | Bohai Sea, China       |
| 63 | Va105 | 045-001   | 2006 | Seawater | Bohai Sea, China       |
| 64 | Va106 | 046-001-2 | 2006 | Seawater | Bohai Sea, China       |
| 65 | Va107 | 046-004   | 2006 | Seawater | Bohai Sea, China       |
| 66 | Va108 | 049-001   | 2006 | Seawater | Bohai Sea, China       |
| 67 | Va109 | 049-004   | 2006 | Seawater | Bohai Sea, China       |
| 68 | Va110 | 050-003   | 2006 | Seawater | Bohai Sea, China       |
| 69 | Va111 | 052-001   | 2006 | Seawater | Bohai Sea, China       |
| 70 | Va113 | 052-003   | 2006 | Seawater | Bohai Sea, China       |
| 71 | Va114 | 053-002   | 2006 | Seawater | Bohai Sea, China       |
| 72 | Va115 | 053-003   | 2006 | Seawater | Bohai Sea, China       |
| 73 | Va116 | 053-004   | 2006 | Seawater | Bohai Sea, China       |
| 74 | Va117 | 053-005   | 2006 | Seawater | Bohai Sea, China       |
| 75 | Va118 | 053-006   | 2006 | Seawater | Bohai Sea, China       |
| 76 | Va119 | 054-001   | 2006 | Seawater | Bohai Sea, China       |
| 77 | Va120 | 054-002   | 2006 | Seawater | Bohai Sea, China       |
| 78 | Va121 | 054-003   | 2006 | Seawater | Bohai Sea, China       |
| 79 | Va122 | 054-004   | 2006 | Seawater | Bohai Sea, China       |
| 80 | Va123 | 054-005   | 2006 | Seawater | Bohai Sea, China       |
| 81 | Va124 | 082-101   | 2006 | Seawater | South China Sea, China |
| 82 | Va125 | 086-101   | 2006 | Seawater | South China Sea, China |
| 83 | Va126 | 088-001   | 2006 | Seawater | South China Sea, China |
| 84 | Va127 | 091-301   | 2006 | Seawater | South China Sea, China |
| 85 | Va128 | 092-206   | 2006 | Seawater | South China Sea, China |

|     |       |           |      |          |                        |
|-----|-------|-----------|------|----------|------------------------|
| 86  | Va129 | 094-201   | 2006 | Seawater | South China Sea, China |
| 87  | Va130 | 094-201-2 | 2006 | Seawater | South China Sea, China |
| 88  | Va131 | 094-203   | 2006 | Seawater | South China Sea, China |
| 89  | Va132 | 094-204   | 2006 | Seawater | South China Sea, China |
| 90  | Va133 | 098-301   | 2006 | Seawater | South China Sea, China |
| 91  | Va135 | 100-101   | 2006 | Seawater | South China Sea, China |
| 92  | Va136 | 101-901   | 2006 | Seawater | South China Sea, China |
| 93  | Va137 | 102-101   | 2006 | Seawater | South China Sea, China |
| 94  | Va138 | 102-201   | 2006 | Seawater | South China Sea, China |
| 95  | Va140 | 106-002   | 2007 | Seawater | Yellow Sea, China      |
| 96  | Va141 | 106-003   | 2007 | Seawater | Yellow Sea, China      |
| 97  | Va142 | 106-005   | 2007 | Seawater | Yellow Sea, China      |
| 98  | Va143 | 107-005   | 2007 | Seawater | Yellow Sea, China      |
| 99  | Va144 | 108-004   | 2007 | Seawater | Yellow Sea, China      |
| 100 | Va145 | 108-005   | 2007 | Seawater | Yellow Sea, China      |
| 101 | Va146 | 109-001   | 2007 | Seawater | Yellow Sea, China      |
| 102 | Va147 | 110-002   | 2007 | Seawater | Yellow Sea, China      |
| 103 | Va149 | 111-004-1 | 2007 | Seawater | Yellow Sea, China      |
| 104 | Va152 | 112-002   | 2007 | Seawater | Yellow Sea, China      |
| 105 | Va153 | 114-003   | 2007 | Seawater | Yellow Sea, China      |
| 106 | Va154 | 116-001   | 2007 | Seawater | Yellow Sea, China      |
| 107 | Va158 | 121-001   | 2007 | Seawater | Yellow Sea, China      |
| 108 | Va159 | 121-002   | 2007 | Seawater | Yellow Sea, China      |
| 109 | Va160 | 121-002   | 2007 | Seawater | Yellow Sea, China      |
| 110 | Va161 | 122-002   | 2007 | Seawater | Yellow Sea, China      |
| 111 | Va162 | 123-006   | 2007 | Seawater | Yellow Sea, China      |
| 112 | Va171 | 127-009   | 2007 | Seawater | Yellow Sea, China      |
| 113 | Va173 | 128-002   | 2007 | Seawater | Yellow Sea, China      |
| 114 | Va177 | 128-006   | 2007 | Seawater | Yellow Sea, China      |



|     |       |         |      |          |                   |
|-----|-------|---------|------|----------|-------------------|
| 115 | Va178 | 129-001 | 2007 | Seawater | Yellow Sea, China |
| 116 | Va183 | 131-007 | 2007 | Seawater | Yellow Sea, China |
| 117 | Va185 | 133-005 | 2007 | Seawater | Yellow Sea, China |
| 118 | Va186 | 132-012 | 2007 | Seawater | Yellow Sea, China |
| 119 | Va187 | 133-005 | 2007 | Seawater | Yellow Sea, China |
| 120 | Va189 | 134-001 | 2007 | Seawater | Yellow Sea, China |
| 121 | Va190 | 133-009 | 2007 | Seawater | Yellow Sea, China |
| 122 | Va191 | 135-007 | 2007 | Seawater | Yellow Sea, China |
| 123 | Va192 | 136-006 | 2007 | Seawater | Yellow Sea, China |
| 124 | Va193 | 137-008 | 2007 | Seawater | Yellow Sea, China |
| 125 | Va194 | 138-001 | 2007 | Seawater | Yellow Sea, China |
| 126 | Va195 | 136-006 | 2007 | Seawater | Yellow Sea, China |
| 127 | Va196 | 139-009 | 2007 | Seawater | Yellow Sea, China |
| 128 | Va197 | 140-002 | 2007 | Seawater | Yellow Sea, China |
| 129 | Va198 | 138-001 | 2007 | Seawater | Yellow Sea, China |
| 130 | Va200 | 147-004 | 2007 | Seawater | Yellow Sea, China |
| 131 | Va202 | 503-003 | 2013 | Seawater | Maldives          |
| 132 | Va203 | 503-006 | 2013 | Seawater | Maldives          |
| 133 | Va204 | 503-007 | 2013 | Seawater | Maldives          |

39

40

41

**TABLE S2** Genomic overview of *Vibrio alginolyticus* genomes collected from NCBI by March 2021.

| No. | Strain        | Source                  | Region | Year | Size(Mb) | GC%  | Contigs | CDS  | Genes | rRNA | tRNA | BioSample ID | Accession no.   |
|-----|---------------|-------------------------|--------|------|----------|------|---------|------|-------|------|------|--------------|-----------------|
| 1   | 062916C       | Shellfish hatchery tank | USA    | 2016 | 5.07     | 44.6 | 86      | 4692 | 4899  | 11   | 82   | SAMN12668395 | GCA_013114005.1 |
| 2   | 081416A       | Shellfish hatchery tank | USA    | 2016 | 5.52     | 44.4 | 95      | 5131 | 5380  | 11   | 75   | SAMN12668392 | GCA_013114015.1 |
| 3   | 10N.261.52.A3 | Seawater                | USA    | 2010 | 5.3      | 44.5 | 123     | 4740 | 4916  | 7    | 86   | SAMN11522386 | GCA_005145885.1 |
| 4   | 12G01         | -                       | -      | -    | 5.26     | 44.6 | 20      | 4519 | 4748  | 24   | 61   | SAMN02436162 | GCA_000153505.1 |
| 5   | 2010V-1102    | -                       | USA    | 2010 | 5.34     | 44.6 | 3       | 4712 | 4977  | 37   | 129  | SAMN12648253 | GCA_009763845.1 |

|    |              |                                 |                |      |      |      |     |      |      |    |     |              |                 |
|----|--------------|---------------------------------|----------------|------|------|------|-----|------|------|----|-----|--------------|-----------------|
| 6  | 2013V-1302   | -                               | USA            | 2013 | 5.14 | 44.7 | 2   | 4525 | 4757 | 34 | 125 | SAMN10702675 | GCA_009665435.1 |
| 7  | 2014V-1011   | Patient, wound                  | USA            | 2014 | 5.42 | 44.8 | 4   | 4955 | 5212 | 37 | 130 | SAMN12648291 | GCA_009763085.1 |
| 8  | 2014V-1072   | Patient, abscess                | USA            | 2014 | 5.37 | 44.5 | 2   | 4984 | 5219 | 37 | 130 | SAMN12648292 | GCA_009762875.1 |
| 9  | 2015AW-0011  | -                               | USA            | 2015 | 5.26 | 44.7 | 2   | 4812 | 5055 | 37 | 130 | SAMN12648293 | GCA_012274965.1 |
| 10 | 2439-01      | -                               | -              | -    | 5.23 | 44.6 | 3   | 4625 | 4874 | 37 | 129 | SAMN12648254 | GCA_009763745.1 |
| 11 | 40B          | -                               | -              | -    | 5.14 | 44.6 | 188 | 4344 | 5006 | 44 | 114 | SAMN02470249 | GCA_000176055.1 |
| 12 | ANC4-19      | Coral                           | India          | 2010 | 5.16 | 44.5 | 135 | 4523 | 4721 | 7  | 63  | SAMN04523674 | GCA_001584265.1 |
| 13 | ATCC 17749   | Food                            | -              | -    | 5.15 | 44.7 | 2   | 4481 | 4680 | 34 | 105 | SAMN02603463 | GCA_000354175.2 |
| 14 | ATCC 33787   | Seawater                        | USA            | 1971 | 5.72 | 44.5 | 5   | 5034 | 5302 | 34 | 125 | SAMN04320555 | GCA_001469735.1 |
| 15 | BR233        | Marine sediment                 | Philippines    | 2016 | 5.05 | 44.6 | 69  | 4487 | 4614 | 3  | 88  | SAMN11039181 | GCA_004349375.1 |
| 16 | BSW15        | Seawater                        | France         | 2014 | 5.18 | 44.6 | 114 | 4693 | 4825 | 3  | 59  | SAMN03280974 | GCA_000834085.1 |
| 17 | BSW8         | Seawater                        | France         | 2014 | 5.19 | 44.6 | 105 | 4705 | 4844 | 4  | 61  | SAMN03280973 | GCA_000834155.1 |
| 18 | EPGS         | Seawater                        | China          | 2011 | 5.1  | 44.5 | 55  | 4487 | 4630 | 2  | 76  | SAMN02746033 | GCA_001273715.1 |
| 19 | FA2          | Seawater                        | China          | 2019 | 5.25 | 44.6 | 2   | 4599 | 4802 | 34 | 127 | SAMN12434441 | GCA_011801435.1 |
| 20 | FDAARGOS_108 | Seawater                        | Puerto Rico    | -    | 5.45 | 44.5 | 3   | 4844 | 5194 | 40 | 130 | SAMN03996324 | GCA_002953515.1 |
| 21 | FDAARGOS_110 | Sponge                          | USA            | -    | 5.27 | 44.6 | 2   | 4766 | 5090 | 37 | 129 | SAMN03996326 | GCA_002953535.1 |
| 22 | FDAARGOS_114 | Cockless Spoiled horse mackerel | United Kingdom | -    | 5.18 | 44.7 | 2   | 4641 | 4905 | 37 | 129 | SAMN03996330 | GCA_002953975.1 |
| 23 | FDAARGOS_97  | mackerel                        | Japan          | -    | 5.18 | 44.7 | 2   | 4638 | 4899 | 37 | 129 | SAMN03996338 | GCA_001471275.2 |
| 24 | FDAARGOS_98  | Seawater                        | USA            | 1991 | 5.21 | 44.7 | 3   | 4630 | 4939 | 37 | 138 | SAMN03996257 | GCA_001525595.2 |
| 25 | GS_MYPK1     | Penaeus monodon                 | Malaysia       | 2020 | 5.62 | 44.4 | 5   | 4957 | 5193 | 37 | 129 | SAMN15206675 | GCA_013368735.1 |
| 26 | Hep-1a-2     | Penaeus vannamei                | USA            | 2014 | 5.17 | 44.5 | 83  | 4555 | 4858 | 62 | 155 | SAMN08805477 | GCA_006124875.1 |
| 27 | K01M1        | Seawater                        | Germany        | 2011 | 5.36 | 44.6 | 3   | 4637 | 4860 | 37 | 130 | SAMN05860636 | GCA_002119505.2 |
| 28 | K04M1        | Seawater                        | Germany        | 2011 | 5.65 | 44.3 | 4   | 5076 | 5367 | 37 | 129 | SAMN05860637 | GCA_003613035.1 |
| 29 | K04M3        | Seawater                        | Germany        | 2011 | 5.67 | 44.3 | 3   | 4976 | 5215 | 37 | 130 | SAMN05860638 | GCA_002149105.1 |
| 30 | K04M5        | Seawater                        | Germany        | 2011 | 5.67 | 44.3 | 3   | 5001 | 5275 | 37 | 130 | SAMN05860639 | GCA_002119545.1 |
| 31 | K05K4        | Seawater                        | Germany        | 2011 | 5.64 | 44.3 | 3   | 5106 | 5414 | 37 | 129 | SAMN05860640 | GCA_003613065.1 |

|    |            |                      |         |      |      |      |     |      |      |    |     |               |                 |
|----|------------|----------------------|---------|------|------|------|-----|------|------|----|-----|---------------|-----------------|
| 32 | K06K5      | Seawater             | Germany | 2011 | 5.67 | 44.3 | 4   | 5001 | 5278 | 37 | 130 | SAMN05860641  | GCA_002119565.1 |
| 33 | K08M3      | Seawater             | Germany | 2011 | 5.66 | 44.3 | 3   | 4959 | 5182 | 37 | 130 | SAMN05860642  | GCA_002149085.1 |
| 34 | K09K1      | Seawater             | Germany | 2011 | 5.36 | 44.6 | 2   | 4667 | 4906 | 37 | 130 | SAMN05860644  | GCA_002149065.1 |
| 35 | K10K4      | Seawater             | Germany | 2011 | 5.39 | 44.6 | 2   | 4737 | 5002 | 37 | 130 | SAMN05860645  | GCA_002119585.1 |
| 36 | L22Y01     | Crassostrea gigas    | USA     | 2015 | 5.27 | 44.5 | 53  | 4884 | 5075 | 10 | 73  | SAMN12668396  | GCA_013113955.1 |
| 37 | LF TCBS 15 | Seawater             | China   | 2016 | 5.16 | 44.5 | 44  | 4580 | 4725 | 16 | 88  | SAMN10688326  | GCA_004283075.1 |
| 38 | M3-10      | Holothuria tubulosa  | Spain   | 2015 | 5.15 | 44.6 | 67  | 4613 | 4739 | 7  | 73  | SAMN10880809  | GCA_008271565.1 |
| 39 | NBRC 15630 | Food                 | -       | -    | 5.05 | 44.6 | 76  | 4474 | 4534 | 6  | 123 | SAMD00041824  | GCA_000467145.1 |
| 40 | NCTC 10675 | Food                 | Japan   | 1    | 5.33 | 44.5 | 2   | 4798 | 5131 | 37 | 129 | SAMEA80450668 | GCA_900460325.1 |
| 41 | NCTC 12160 | Food                 | -       | 1    | 5.15 | 44.7 | 19  | 4610 | 4893 | 45 | 132 | SAMEA4384071  | GCA_900460285.1 |
| 42 | QD-5       | Rotten kelp          | China   | 2015 | 5.15 | 44.5 | 39  | 4595 | 4700 | 5  | 63  | SAMN06706663  | GCA_002114195.1 |
| 43 | RM-10-2    | Mollusc              | Canada  | 2015 | 5.28 | 44.6 | 84  | 4716 | 4943 | 29 | 118 | SAMN03795179  | GCA_001267615.1 |
| 44 | RM-12-1    | Mussel               | Canada  | 2015 | 5.32 | 44.6 | 131 | 4795 | 5101 | 58 | 138 | SAMN03799837  | GCA_001270205.1 |
| 45 | S6-61      | Coral                | India   | 2012 | 5.31 | 44.5 | 9   | 4879 | 5151 | 21 | 92  | SAMN12838353  | GCA_008921745.1 |
| 46 | UCD-32C    | Seagrass sediment    | USA     | 2014 | 5.32 | 44.6 | 140 | 4752 | 5047 | 60 | 134 | SAMN04088203  | GCA_001306825.1 |
| 47 | UCD-53C    | Seagrass sediment    | USA     | 2014 | 5.2  | 44.6 | 76  | 4592 | 4856 | 50 | 122 | SAMN04088219  | GCA_001306845.1 |
| 48 | UCD-9C     | Seagrass sediment    | USA     | 2014 | 5.86 | 44.2 | 95  | 5303 | 5597 | 49 | 152 | SAMN04088220  | GCA_001306875.1 |
| 49 | V1         | Sparus aurata        | Greece  | 2007 | 5.26 | 44.5 | 68  | 4655 | 4784 | 4  | 67  | SAMN03580732  | GCA_001013315.1 |
| 50 | VN-7501    | Patient, wound       | Germany | 2011 | 5.16 | 44.4 | 62  | 4691 | 4900 | 6  | 67  | SAMN03457195  | GCA_001617475.1 |
| 51 | ZJ-T       | Epinephelus coioides | China   | 2005 | 5.41 | 44.7 | 2   | 4655 | 4878 | 28 | 124 | SAMN05271497  | GCA_001679745.1 |

42

43

44

45

46

47

48

49

**TABLE S3** Detailed genome information of *Vibrio alginolyticus* strains analyzed in this study

| No. | Strain | Contigs | Max length of scaffold (bp) | N50 length (bp) | L50 value | Genome size (Mb) | G+C (%) | CDS  |
|-----|--------|---------|-----------------------------|-----------------|-----------|------------------|---------|------|
| 1   | Va4    | 57      | 962620                      | 398159          | 4         | 5.08             | 44.6    | 4565 |
| 2   | Va7    | 66      | 473103                      | 273719          | 8         | 5.08             | 44.6    | 4552 |
| 3   | Va11   | 64      | 473103                      | 273719          | 8         | 5.08             | 44.6    | 4553 |
| 4   | Va12   | 65      | 473103                      | 273719          | 8         | 5.08             | 44.6    | 4552 |
| 5   | Va15   | 55      | 1238064                     | 405246          | 4         | 5.26             | 44.4    | 4760 |
| 6   | Va18   | 48      | 805975                      | 399775          | 5         | 5.09             | 44.7    | 4582 |
| 7   | Va19   | 96      | 435390                      | 123667          | 14        | 5.01             | 44.6    | 4561 |
| 8   | Va23   | 69      | 715209                      | 402175          | 5         | 5.43             | 44.4    | 4900 |
| 9   | Va24   | 38      | 1343008                     | 535878          | 3         | 5.10             | 44.6    | 4539 |
| 10  | Va28   | 53      | 947515                      | 292762          | 6         | 5.12             | 44.6    | 4541 |
| 11  | Va32   | 71      | 443146                      | 218539          | 9         | 5.06             | 44.6    | 4535 |
| 12  | Va33   | 46      | 752274                      | 456771          | 4         | 5.07             | 44.6    | 4534 |
| 13  | Va34   | 45      | 568614                      | 346555          | 6         | 5.23             | 44.4    | 4766 |
| 14  | Va35   | 60      | 500355                      | 231000          | 8         | 5.09             | 44.5    | 4613 |
| 15  | Va42   | 74      | 488117                      | 193952          | 9         | 5.19             | 44.6    | 4696 |
| 16  | Va46   | 60      | 586114                      | 230776          | 8         | 5.14             | 44.5    | 4603 |
| 17  | Va47   | 63      | 446984                      | 186795          | 9         | 5.14             | 44.5    | 4596 |
| 18  | Va51   | 50      | 870125                      | 260198          | 5         | 5.23             | 44.6    | 4724 |
| 19  | Va52   | 83      | 289764                      | 135523          | 14        | 5.07             | 44.6    | 4574 |
| 20  | Va53   | 63      | 657268                      | 404094          | 6         | 5.12             | 44.5    | 4603 |
| 21  | Va54   | 42      | 1353232                     | 365557          | 4         | 5.05             | 44.6    | 4506 |
| 22  | Va55   | 61      | 1417729                     | 427038          | 4         | 5.19             | 44.6    | 4708 |
| 23  | Va56   | 53      | 794485                      | 298028          | 6         | 5.16             | 44.6    | 4676 |
| 24  | Va57   | 76      | 678686                      | 432571          | 5         | 5.27             | 44.6    | 4788 |
| 25  | Va59   | 61      | 734328                      | 476229          | 5         | 5.34             | 44.6    | 4874 |
| 26  | Va60   | 84      | 398522                      | 229785          | 9         | 5.31             | 44.5    | 4758 |

|    |      |     |         |        |   |      |      |      |
|----|------|-----|---------|--------|---|------|------|------|
| 27 | Va61 | 58  | 917344  | 383656 | 5 | 5.16 | 44.6 | 4681 |
| 28 | Va62 | 65  | 519680  | 193216 | 8 | 5.00 | 44.6 | 4490 |
| 29 | Va63 | 56  | 1122377 | 411329 | 4 | 5.25 | 44.6 | 4749 |
| 30 | Va64 | 74  | 629868  | 314265 | 6 | 5.13 | 44.6 | 4631 |
| 31 | Va65 | 62  | 1067734 | 333998 | 4 | 5.21 | 44.6 | 4753 |
| 32 | Va66 | 59  | 1072058 | 345149 | 4 | 5.22 | 44.6 | 4754 |
| 33 | Va67 | 75  | 629868  | 328626 | 6 | 5.13 | 44.6 | 4633 |
| 34 | Va68 | 40  | 1839291 | 846957 | 2 | 5.10 | 44.5 | 4597 |
| 35 | Va69 | 60  | 580216  | 301028 | 7 | 5.35 | 44.5 | 4862 |
| 36 | Va70 | 75  | 551931  | 301157 | 7 | 5.14 | 44.5 | 4693 |
| 37 | Va71 | 55  | 1383866 | 414085 | 4 | 5.03 | 44.6 | 4485 |
| 38 | Va72 | 44  | 1208008 | 347324 | 4 | 5.02 | 44.6 | 4469 |
| 39 | Va74 | 73  | 675697  | 191450 | 7 | 5.27 | 44.5 | 4801 |
| 40 | Va75 | 82  | 574578  | 196526 | 8 | 5.08 | 44.5 | 4608 |
| 41 | Va76 | 62  | 456161  | 232474 | 9 | 5.20 | 44.4 | 4653 |
| 42 | Va77 | 86  | 960212  | 393833 | 5 | 5.09 | 44.6 | 4572 |
| 43 | Va78 | 76  | 430711  | 237688 | 8 | 5.10 | 44.6 | 4611 |
| 44 | Va82 | 52  | 671091  | 249163 | 6 | 5.09 | 44.5 | 4599 |
| 45 | Va84 | 55  | 671091  | 247458 | 7 | 5.09 | 44.5 | 4600 |
| 46 | Va86 | 78  | 451934  | 261029 | 8 | 5.22 | 44.5 | 4677 |
| 47 | Va87 | 54  | 671091  | 247458 | 7 | 5.08 | 44.5 | 4599 |
| 48 | Va88 | 51  | 673831  | 258372 | 6 | 5.09 | 44.6 | 4584 |
| 49 | Va89 | 52  | 707732  | 370870 | 5 | 5.02 | 44.6 | 4505 |
| 50 | Va90 | 126 | 456717  | 219186 | 9 | 5.17 | 44.6 | 4658 |
| 51 | Va91 | 86  | 456525  | 210305 | 9 | 5.06 | 44.6 | 4580 |
| 52 | Va92 | 70  | 444132  | 244608 | 8 | 5.15 | 44.6 | 4634 |
| 53 | Va93 | 97  | 711160  | 191257 | 8 | 5.19 | 44.5 | 4673 |
| 54 | Va94 | 57  | 528684  | 346637 | 6 | 5.13 | 44.5 | 4672 |
| 55 | Va95 | 94  | 674973  | 250399 | 7 | 5.32 | 44.4 | 4827 |

|    |       |     |         |        |    |      |      |      |
|----|-------|-----|---------|--------|----|------|------|------|
| 56 | Va96  | 44  | 705226  | 348640 | 5  | 5.08 | 44.5 | 4539 |
| 57 | Va98  | 99  | 473294  | 252022 | 8  | 5.15 | 44.5 | 4722 |
| 58 | Va99  | 62  | 528245  | 301085 | 6  | 5.13 | 44.5 | 4671 |
| 59 | Va101 | 98  | 533713  | 402574 | 6  | 5.13 | 44.6 | 4632 |
| 60 | Va102 | 93  | 415913  | 219151 | 10 | 5.19 | 44.5 | 4657 |
| 61 | Va103 | 86  | 1111313 | 510538 | 4  | 5.08 | 44.6 | 4579 |
| 62 | Va104 | 84  | 916096  | 426206 | 5  | 5.13 | 44.6 | 4653 |
| 63 | Va105 | 41  | 1353092 | 756323 | 3  | 5.10 | 44.6 | 4590 |
| 64 | Va106 | 45  | 817333  | 442887 | 5  | 5.22 | 44.5 | 4716 |
| 65 | Va107 | 73  | 672240  | 451663 | 5  | 5.14 | 44.7 | 4666 |
| 66 | Va108 | 49  | 717659  | 339605 | 6  | 5.23 | 44.6 | 4751 |
| 67 | Va109 | 60  | 430711  | 266660 | 8  | 5.09 | 44.6 | 4601 |
| 68 | Va110 | 63  | 430703  | 266652 | 8  | 5.09 | 44.6 | 4602 |
| 69 | Va111 | 60  | 767457  | 308802 | 5  | 5.16 | 44.6 | 4635 |
| 70 | Va113 | 87  | 708694  | 329018 | 6  | 5.06 | 44.6 | 4546 |
| 71 | Va114 | 57  | 1814907 | 447224 | 3  | 5.11 | 44.6 | 4624 |
| 72 | Va115 | 52  | 783484  | 367172 | 5  | 5.01 | 44.6 | 4525 |
| 73 | Va116 | 48  | 466987  | 237097 | 7  | 5.00 | 44.6 | 4498 |
| 74 | Va117 | 52  | 872283  | 460343 | 4  | 5.09 | 44.6 | 4548 |
| 75 | Va118 | 101 | 399137  | 187512 | 10 | 5.23 | 44.6 | 4764 |
| 76 | Va119 | 46  | 526800  | 388601 | 6  | 5.00 | 44.6 | 4499 |
| 77 | Va120 | 48  | 742541  | 367433 | 5  | 5.22 | 44.6 | 4743 |
| 78 | Va121 | 68  | 859523  | 452893 | 4  | 5.16 | 44.6 | 4606 |
| 79 | Va122 | 39  | 1384789 | 556273 | 3  | 5.10 | 44.6 | 4585 |
| 80 | Va123 | 75  | 802377  | 290757 | 6  | 5.14 | 44.6 | 4653 |
| 81 | Va124 | 45  | 1814909 | 447224 | 3  | 5.10 | 44.6 | 4605 |
| 82 | Va125 | 62  | 802348  | 270861 | 7  | 5.29 | 44.4 | 4810 |
| 83 | Va126 | 71  | 1080241 | 276234 | 6  | 5.30 | 44.4 | 4825 |
| 84 | Va127 | 77  | 802377  | 290757 | 6  | 5.14 | 44.6 | 4655 |

|     |       |    |         |        |   |      |      |      |
|-----|-------|----|---------|--------|---|------|------|------|
| 85  | Va128 | 75 | 802377  | 290757 | 6 | 5.31 | 44.4 | 4832 |
| 86  | Va129 | 78 | 802377  | 290757 | 6 | 5.14 | 44.6 | 4657 |
| 87  | Va130 | 45 | 802053  | 270789 | 7 | 5.11 | 44.5 | 4612 |
| 88  | Va131 | 45 | 802053  | 270789 | 7 | 5.11 | 44.6 | 4607 |
| 89  | Va132 | 55 | 802348  | 270861 | 7 | 5.11 | 44.5 | 4623 |
| 90  | Va133 | 52 | 1080521 | 308021 | 5 | 5.29 | 44.4 | 4819 |
| 91  | Va135 | 48 | 1087730 | 308021 | 5 | 5.12 | 44.6 | 4644 |
| 92  | Va136 | 66 | 802348  | 270861 | 7 | 5.29 | 44.4 | 4811 |
| 93  | Va137 | 84 | 802377  | 291071 | 6 | 5.15 | 44.6 | 4667 |
| 94  | Va138 | 67 | 802340  | 214850 | 8 | 5.29 | 44.4 | 4816 |
| 95  | Va140 | 70 | 1542338 | 319997 | 4 | 5.11 | 44.6 | 4599 |
| 96  | Va141 | 55 | 557963  | 345007 | 6 | 5.09 | 44.6 | 4570 |
| 97  | Va142 | 56 | 557963  | 292272 | 6 | 5.09 | 44.6 | 4573 |
| 98  | Va143 | 76 | 1542353 | 319989 | 4 | 5.11 | 44.6 | 4602 |
| 99  | Va144 | 68 | 568790  | 229869 | 7 | 5.21 | 44.5 | 4714 |
| 100 | Va145 | 86 | 680350  | 209047 | 8 | 5.24 | 44.5 | 4797 |
| 101 | Va146 | 55 | 557963  | 292272 | 6 | 5.09 | 44.6 | 4575 |
| 102 | Va147 | 45 | 937191  | 447836 | 4 | 5.20 | 44.5 | 4689 |
| 103 | Va149 | 32 | 807651  | 565408 | 4 | 5.13 | 44.5 | 4601 |
| 104 | Va152 | 42 | 742256  | 438554 | 5 | 5.11 | 44.7 | 4603 |
| 105 | Va153 | 50 | 725879  | 451772 | 5 | 5.11 | 44.6 | 4592 |
| 106 | Va154 | 67 | 765132  | 275041 | 6 | 5.09 | 44.6 | 4573 |
| 107 | Va158 | 77 | 729993  | 314537 | 5 | 5.15 | 44.5 | 4676 |
| 108 | Va159 | 74 | 600141  | 271804 | 7 | 5.06 | 44.6 | 4535 |
| 109 | Va160 | 35 | 807651  | 543206 | 4 | 5.12 | 44.5 | 4601 |
| 110 | Va161 | 93 | 923515  | 249124 | 5 | 5.15 | 44.5 | 4678 |
| 111 | Va162 | 50 | 736752  | 440129 | 5 | 5.11 | 44.6 | 4620 |
| 112 | Va171 | 62 | 1820445 | 531113 | 3 | 5.24 | 44.6 | 4736 |
| 113 | Va173 | 62 | 882566  | 264175 | 5 | 5.06 | 44.5 | 4549 |

|     |       |     |         |        |    |      |      |      |
|-----|-------|-----|---------|--------|----|------|------|------|
| 114 | Va177 | 62  | 493821  | 245779 | 8  | 5.27 | 44.6 | 4773 |
| 115 | Va178 | 80  | 668773  | 312601 | 6  | 5.22 | 44.6 | 4743 |
| 116 | Va183 | 40  | 932020  | 320016 | 5  | 5.16 | 44.5 | 4607 |
| 117 | Va185 | 60  | 930702  | 438428 | 4  | 5.09 | 44.6 | 4572 |
| 118 | Va186 | 46  | 719787  | 355954 | 5  | 5.16 | 44.5 | 4631 |
| 119 | Va187 | 69  | 566382  | 234197 | 7  | 5.12 | 44.6 | 4597 |
| 120 | Va189 | 91  | 580216  | 301028 | 7  | 5.31 | 44.7 | 4826 |
| 121 | Va190 | 51  | 902114  | 315809 | 5  | 5.23 | 44.4 | 4689 |
| 122 | Va191 | 92  | 707037  | 466524 | 5  | 5.16 | 44.7 | 4683 |
| 123 | Va192 | 130 | 410729  | 179671 | 9  | 5.13 | 44.7 | 4646 |
| 124 | Va193 | 99  | 580216  | 301028 | 7  | 5.31 | 44.7 | 4834 |
| 125 | Va194 | 68  | 868319  | 523908 | 4  | 5.29 | 44.7 | 4774 |
| 126 | Va195 | 38  | 1380856 | 356085 | 5  | 5.25 | 44.6 | 4737 |
| 127 | Va196 | 90  | 675820  | 308449 | 6  | 5.30 | 44.7 | 4822 |
| 128 | Va197 | 161 | 454228  | 193559 | 10 | 5.34 | 44.8 | 4870 |
| 129 | Va198 | 63  | 494561  | 277159 | 8  | 5.27 | 44.6 | 4778 |
| 130 | Va200 | 93  | 797450  | 311685 | 6  | 5.19 | 44.6 | 4695 |
| 131 | Va202 | 95  | 488967  | 362447 | 6  | 5.32 | 44.7 | 4854 |
| 132 | Va203 | 94  | 1125949 | 328183 | 5  | 5.30 | 44.7 | 4793 |
| 133 | Va204 | 100 | 585949  | 321395 | 6  | 5.28 | 44.6 | 4770 |

50  
51  
52  
53  
54

**TABLE S4** Unique gene clusters present in Group 1 strains K01M1, K04M1, K04M3, K04M5, K05K4, K06K5, K08M3, K09K1, K10K4.

| Gene        | Order within Fragment | Accessory Fragment | Accessory Order with Fragment | Min group size nuc | Max group size nuc | Avg group size nuc | Annotation           |
|-------------|-----------------------|--------------------|-------------------------------|--------------------|--------------------|--------------------|----------------------|
| group_20823 | 10598                 | 1                  | 9541                          | 863                | 863                | 863                | hypothetical protein |



|             |       |     |      |      |      |      |                                                                 |
|-------------|-------|-----|------|------|------|------|-----------------------------------------------------------------|
| group_20826 | 11440 | 1   | 7036 | 737  | 737  | 737  | hypothetical protein                                            |
| group_20827 | 10992 | 1   | 7256 | 1319 | 1319 | 1319 | hypothetical protein                                            |
| group_20828 | 10989 | 1   | 7260 | 1220 | 1220 | 1220 | hypothetical protein                                            |
| epsJ        | 10987 | 1   | 7261 | 896  | 896  | 896  | putative glycosyltransferase EpsJ                               |
| group_20830 | 10986 | 1   | 7262 | 761  | 761  | 761  | Putative teichuronic acid biosynthesis glycosyltransferase TuaG |
| group_20831 | 10985 | 1   | 7263 | 2105 | 2105 | 2105 | hypothetical protein                                            |
| group_20832 | 15202 | 1   | 780  | 656  | 656  | 656  | hypothetical protein                                            |
| group_20833 | 15203 | 1   | 779  | 1160 | 1160 | 1160 | hypothetical protein                                            |
| group_20834 | 15204 | 1   | 778  | 791  | 791  | 791  | hypothetical protein                                            |
| group_20835 | 15205 | 1   | 788  | 431  | 431  | 431  | hypothetical protein                                            |
| group_20836 | 15206 | 1   | 790  | 179  | 179  | 179  | hypothetical protein                                            |
| oadG_1      | 180   | 1   | 8155 | 251  | 251  | 251  | oxaloacetate decarboxylase gamma chain                          |
| group_20848 | 15201 | 1   | 8168 | 224  | 224  | 224  | hypothetical protein                                            |
| group_20849 | 15183 | 446 | 1    | 494  | 494  | 494  | hypothetical protein                                            |
| group_20850 | 15185 | 417 | 1    | 728  | 728  | 728  | Bacitracin export ATP-binding protein BceA                      |
| group_20851 | 15184 | 417 | 2    | 665  | 665  | 665  | hypothetical protein                                            |
| group_20852 | 15666 | 417 | 3    | 299  | 299  | 299  | hypothetical protein                                            |
| group_20853 | 15182 | 1   | 8346 | 638  | 638  | 638  | Peptide methionine sulfoxide reductase MsrA                     |
| group_20854 | 15178 | 1   | 8347 | 1712 | 1712 | 1712 | Translocation and assembly module subunit TamA                  |
| group_20855 | 15179 | 1   | 8348 | 3764 | 3764 | 3764 | Translocation and assembly module subunit TamB                  |
| group_20856 | 15180 | 1   | 8349 | 347  | 347  | 347  | Gamma-glutamylcyclotransferase                                  |

|             |       |   |       |      |      |      |                                  |
|-------------|-------|---|-------|------|------|------|----------------------------------|
| group_20861 | 14915 | 1 | 3827  | 182  | 182  | 182  | family protein YtfP              |
| group_20863 | 14926 | 1 | 3838  | 209  | 209  | 209  | hypothetical protein             |
| group_20871 | 18373 | 1 | 2309  | 527  | 527  | 527  | hypothetical protein             |
| group_20872 | 18372 | 1 | 2308  | 497  | 497  | 497  | hypothetical protein             |
| group_20873 | 18371 | 1 | 2307  | 755  | 755  | 755  | hypothetical protein             |
| group_20874 | 18370 | 1 | 2306  | 656  | 656  | 656  | hypothetical protein             |
| group_20875 | 18369 | 1 | 2305  | 971  | 971  | 971  | hypothetical protein             |
| group_20876 | 18368 | 1 | 2340  | 704  | 704  | 704  | hypothetical protein             |
| group_20880 | 21450 | 1 | 155   | 683  | 683  | 683  | hypothetical protein             |
| group_20881 | 21449 | 1 | 154   | 644  | 644  | 644  | hypothetical protein             |
| group_20882 | 21448 | 1 | 153   | 362  | 362  | 362  | hypothetical protein             |
| group_20883 | 21440 | 1 | 152   | 1265 | 1265 | 1265 | hypothetical protein             |
| group_20884 | 21441 | 1 | 151   | 1016 | 1016 | 1016 | hypothetical protein             |
| group_20885 | 21442 | 1 | 150   | 182  | 182  | 182  | hypothetical protein             |
| group_20886 | 21444 | 1 | 149   | 254  | 254  | 254  | hypothetical protein             |
| group_20887 | 21443 | 1 | 148   | 899  | 899  | 899  | hypothetical protein             |
| group_20888 | 20047 | 1 | 147   | 479  | 479  | 479  | hypothetical protein             |
| group_20889 | 20048 | 1 | 146   | 203  | 203  | 203  | hypothetical protein             |
| group_20890 | 20049 | 1 | 145   | 614  | 614  | 614  | hypothetical protein             |
| group_20891 | 20050 | 1 | 13444 | 356  | 356  | 356  | hypothetical protein             |
| group_20892 | 20046 | 1 | 143   | 563  | 563  | 563  | hypothetical protein             |
| smc_1       | 18909 | 1 | 144   | 1511 | 1511 | 1511 | Chromosome partition protein Smc |
| group_20894 | 7592  | 1 | 14745 | 449  | 449  | 449  | hypothetical protein             |
| group_20896 | 1960  | 1 | 2864  | 914  | 914  | 914  | hypothetical protein             |
| group_20897 | 1961  | 1 | 2865  | 500  | 500  | 500  | hypothetical protein             |
| group_20898 | 1962  | 1 | 2866  | 188  | 188  | 188  | hypothetical protein             |
| group_20899 | 3543  | 1 | 15640 | 842  | 842  | 842  | hypothetical protein             |

|             |       |   |       |      |      |      |                                                         |
|-------------|-------|---|-------|------|------|------|---------------------------------------------------------|
| group_20900 | 3542  | 1 | 11084 | 776  | 776  | 776  | hypothetical protein                                    |
| group_20901 | 4980  | 1 | 11086 | 635  | 635  | 635  | hypothetical protein                                    |
| group_20902 | 4979  | 1 | 11085 | 143  | 143  | 143  | hypothetical protein                                    |
| group_20903 | 4977  | 1 | 4394  | 1250 | 1250 | 1250 | hypothetical protein                                    |
| aspT_3      | 4975  | 1 | 4395  | 1769 | 1769 | 1769 | Aspartate/alanine antiporter                            |
| gadA        | 4974  | 1 | 4396  | 1394 | 1394 | 1394 | Glutamate decarboxylase                                 |
| corA        | 4973  | 1 | 4397  | 956  | 956  | 956  | Magnesium transport protein CorA                        |
| group_20907 | 4972  | 1 | 4398  | 1193 | 1193 | 1193 | hypothetical protein                                    |
| group_20908 | 4969  | 1 | 4401  | 452  | 452  | 452  | hypothetical protein                                    |
| arpC_1      | 4968  | 1 | 4402  | 1535 | 1535 | 1535 | Antibiotic efflux pump outer membrane protein ArpC      |
| mdtO        | 4967  | 1 | 4403  | 1910 | 1910 | 1910 | Multidrug resistance protein MdtO                       |
| group_20911 | 4966  | 1 | 4404  | 1064 | 1064 | 1064 | Multidrug resistance protein MdtN                       |
| group_20912 | 11909 | 1 | 4405  | 203  | 203  | 203  | hypothetical protein                                    |
| yxeI_1      | 11910 | 1 | 4406  | 1163 | 1163 | 1163 | putative protein YxeI                                   |
| cbh_1       | 11911 | 1 | 4407  | 974  | 974  | 974  | Choloylglycine hydrolase                                |
| aspT_4      | 11912 | 1 | 4408  | 1691 | 1691 | 1691 | Aspartate/alanine antiporter                            |
| nhaK        | 11913 | 1 | 4409  | 1343 | 1343 | 1343 | Sodium, potassium, lithium and rubidium/H( ) antiporter |
| cbh_2       | 11914 | 1 | 4410  | 1040 | 1040 | 1040 | Choloylglycine hydrolase                                |
| group_20918 | 11915 | 1 | 4411  | 680  | 680  | 680  | hypothetical protein                                    |
| group_20919 | 11916 | 1 | 4412  | 341  | 341  | 341  | hypothetical protein                                    |
| dmsD        | 9441  | 1 | 4414  | 575  | 575  | 575  | Tat proofreading chaperone                              |

|             |      |   |      |      |      |      |                                                                  |
|-------------|------|---|------|------|------|------|------------------------------------------------------------------|
| group_20921 | 7662 | 1 | 8600 | 806  | 806  | 806  | DmsD                                                             |
|             |      |   |      |      |      |      | HTH-type transcriptional regulator NimR                          |
| zraR_3      | 7661 | 1 | 8599 | 431  | 431  | 431  | Transcriptional regulatory protein ZraR                          |
| nifA        | 2312 | 1 | 8598 | 338  | 338  | 338  | Nif-specific regulatory protein                                  |
| tehA_1      | 2313 | 1 | 8597 | 980  | 980  | 980  | Tellurite resistance protein TehA                                |
| group_20925 | 2314 | 1 | 8596 | 341  | 341  | 341  | hypothetical protein                                             |
| group_20926 | 2315 | 1 | 8595 | 371  | 371  | 371  | hypothetical protein                                             |
| yagU        | 2316 | 1 | 8594 | 611  | 611  | 611  | Inner membrane protein YagU                                      |
| group_20928 | 2317 | 1 | 8593 | 1109 | 1109 | 1109 | putative cyclic di-GMP phosphodiesterase PdeG                    |
| group_20929 | 2318 | 1 | 8592 | 614  | 614  | 614  | Virulence factors putative positive transcription regulator BvgA |
| ecpE        | 2320 | 1 | 8590 | 644  | 644  | 644  | putative fimbrial chaperone EcpE                                 |
| ecpD        | 2321 | 1 | 8589 | 1421 | 1421 | 1421 | Fimbria adhesin EcpD                                             |
| group_20932 | 2322 | 1 | 8588 | 2531 | 2531 | 2531 | hypothetical protein                                             |
| group_20933 | 2323 | 1 | 8587 | 1880 | 1880 | 1880 | hypothetical protein                                             |
| group_20934 | 2324 | 1 | 8586 | 1025 | 1025 | 1025 | Outer membrane protein A                                         |
| group_20935 | 2325 | 1 | 8585 | 1088 | 1088 | 1088 | hypothetical protein                                             |
| group_20936 | 2326 | 1 | 8584 | 707  | 707  | 707  | hypothetical protein                                             |
| group_20937 | 2327 | 1 | 8583 | 2741 | 2741 | 2741 | hypothetical protein                                             |
| group_20938 | 2328 | 1 | 8582 | 572  | 572  | 572  | hypothetical protein                                             |
| group_20939 | 2329 | 1 | 8581 | 566  | 566  | 566  | hypothetical protein                                             |
| group_20940 | 2330 | 1 | 8580 | 245  | 245  | 245  | hypothetical protein                                             |

|             |       |   |       |      |      |      |                                                                        |
|-------------|-------|---|-------|------|------|------|------------------------------------------------------------------------|
| group_20941 | 2331  | 1 | 8579  | 323  | 323  | 323  | hypothetical protein                                                   |
| group_20942 | 2332  | 1 | 8578  | 3344 | 3344 | 3344 | Beta-glucosidase BoGH3B                                                |
| bvgS        | 2334  | 1 | 8576  | 3560 | 3560 | 3560 | Virulence sensor protein<br>BvgS                                       |
| group_20944 | 2335  | 1 | 8575  | 599  | 599  | 599  | Virulence factors putative<br>positive transcription<br>regulator BvgA |
| group_20945 | 2336  | 1 | 8574  | 194  | 194  | 194  | hypothetical protein                                                   |
| group_20946 | 2337  | 1 | 8573  | 557  | 557  | 557  | hypothetical protein                                                   |
| hns_2       | 2338  | 1 | 8572  | 380  | 380  | 380  | DNA-binding protein H-NS                                               |
| group_20948 | 2310  | 1 | 11643 | 281  | 281  | 281  | hypothetical protein                                                   |
| group_20949 | 421   | 1 | 11660 | 380  | 380  | 380  | hypothetical protein                                                   |
| group_20950 | 3517  | 1 | 1868  | 1895 | 1895 | 1895 | hypothetical protein                                                   |
| group_20951 | 14380 | 1 | 6841  | 875  | 875  | 875  | hypothetical protein                                                   |
| group_20952 | 13423 | 1 | 8286  | 1403 | 1403 | 1403 | Tyrosine recombinase XerC                                              |
| group_20953 | 13422 | 1 | 8287  | 2345 | 2345 | 2345 | hypothetical protein                                                   |
| group_20954 | 13421 | 1 | 8288  | 2195 | 2195 | 2195 | hypothetical protein                                                   |
| group_20955 | 13420 | 1 | 8289  | 503  | 503  | 503  | hypothetical protein                                                   |
| bcp_2       | 13419 | 1 | 8290  | 464  | 464  | 464  | Peroxiredoxin Bcp                                                      |
| group_20957 | 13418 | 1 | 8291  | 632  | 632  | 632  | hypothetical protein                                                   |
| frdA_1      | 13417 | 1 | 8292  | 785  | 785  | 785  | Fumarate reductase<br>flavoprotein subunit                             |
| ltxB_1      | 13416 | 1 | 8293  | 2135 | 2135 | 2135 | Leukotoxin export ATP-<br>binding protein LtxB                         |
| cvaA        | 13415 | 1 | 8294  | 1256 | 1256 | 1256 | Colicin V secretion protein<br>CvaA                                    |
| group_20961 | 13414 | 1 | 8295  | 983  | 983  | 983  | hypothetical protein                                                   |
| group_20962 | 13413 | 1 | 8296  | 272  | 272  | 272  | hypothetical protein                                                   |
| group_20963 | 13412 | 1 | 8297  | 287  | 287  | 287  | hypothetical protein                                                   |
| icaA_2      | 13411 | 1 | 8298  | 1175 | 1175 | 1175 | Poly-beta-1,6-N-acetyl-D-                                              |

|             |       |   |       |      |      |      |                                        |
|-------------|-------|---|-------|------|------|------|----------------------------------------|
| group_20965 | 13410 | 1 | 8299  | 1403 | 1403 | 1403 | glucosamine synthase                   |
| group_20966 | 12779 | 1 | 8300  | 518  | 518  | 518  | hypothetical protein                   |
| fis_1       | 1330  | 1 | 8277  | 269  | 269  | 269  | DNA-binding protein Fis                |
| group_20968 | 10218 | 1 | 6612  | 284  | 284  | 284  | hypothetical protein                   |
| group_20969 | 13321 | 1 | 3357  | 2339 | 2339 | 2339 | hypothetical protein                   |
| group_20970 | 21788 | 1 | 3358  | 2423 | 2423 | 2423 | hypothetical protein                   |
| group_20971 | 21789 | 1 | 3359  | 524  | 524  | 524  | hypothetical protein                   |
| group_20972 | 21790 | 1 | 3360  | 1364 | 1364 | 1364 | Tyrosine recombinase XerC              |
| dinB_1      | 21791 | 1 | 3361  | 1052 | 1052 | 1052 | DNA polymerase IV                      |
| vspR_1      | 21792 | 1 | 3362  | 203  | 203  | 203  | Transcriptional regulator<br>VspR      |
| cotR        | 5598  | 1 | 15351 | 1094 | 1094 | 1094 | Putative sporulation<br>hydrolase CotR |
| group_20976 | 9798  | 1 | 15765 | 467  | 467  | 467  | hypothetical protein                   |
| group_20978 | 4003  | 1 | 15573 | 581  | 581  | 581  | hypothetical protein                   |
| group_20979 | 4002  | 1 | 4217  | 698  | 698  | 698  | hypothetical protein                   |
| group_20980 | 8564  | 1 | 4218  | 863  | 863  | 863  | hypothetical protein                   |
| group_20981 | 8565  | 1 | 4219  | 209  | 209  | 209  | hypothetical protein                   |
| group_20982 | 20656 | 1 | 12673 | 2705 | 2705 | 2705 | hypothetical protein                   |
| group_20984 | 20655 | 1 | 12674 | 266  | 266  | 266  | hypothetical protein                   |
| group_20986 | 20911 | 1 | 12676 | 1457 | 1457 | 1457 | hypothetical protein                   |
| group_20991 | 4280  | 1 | 7583  | 2822 | 2822 | 2822 | hypothetical protein                   |
| group_20992 | 4289  | 1 | 7591  | 398  | 398  | 398  | hypothetical protein                   |
| group_20993 | 4290  | 1 | 7592  | 380  | 380  | 380  | hypothetical protein                   |
| group_20994 | 4291  | 1 | 7593  | 389  | 389  | 389  | hypothetical protein                   |
| group_20995 | 4292  | 1 | 7594  | 392  | 392  | 392  | hypothetical protein                   |
| group_20996 | 4293  | 1 | 7595  | 515  | 515  | 515  | hypothetical protein                   |
| group_20997 | 19266 | 1 | 4773  | 1463 | 1463 | 1463 | hypothetical protein                   |
| group_20998 | 19270 | 1 | 5290  | 698  | 698  | 698  | hypothetical protein                   |

|             |       |   |      |      |      |      |                                  |
|-------------|-------|---|------|------|------|------|----------------------------------|
| group_20999 | 19271 | 1 | 5291 | 1052 | 1052 | 1052 | hypothetical protein             |
| group_21000 | 19272 | 1 | 5292 | 1301 | 1301 | 1301 | hypothetical protein             |
| group_21001 | 19273 | 1 | 5293 | 539  | 539  | 539  | hypothetical protein             |
| group_21002 | 19274 | 1 | 5294 | 2327 | 2327 | 2327 | Chromosome partition protein Smc |
| group_21003 | 19275 | 1 | 5295 | 728  | 728  | 728  | hypothetical protein             |
| group_21004 | 19276 | 1 | 5296 | 824  | 824  | 824  | hypothetical protein             |

55  
56  
57  
58  
59  
60

**Table S5** Unique gene clusters present in Group 2 strains, Va123, Va130, Va131, Va125, Va126, Va127, Va128, Va129, Va132, Va133, Va135, Va136, Va137, Va138.

| Gene       | Order within Fragment | Accessory Fragment | Accessory Order with Fragment | Min group size nuc | Max group size nuc | Avg group size nuc | Annotation                |
|------------|-----------------------|--------------------|-------------------------------|--------------------|--------------------|--------------------|---------------------------|
| group_9825 | 6009                  | 197                | 1                             | 521                | 521                | 521                | hypothetical protein      |
| group_9828 | 21254                 | 1                  | 12272                         | 221                | 221                | 221                | hypothetical protein      |
| group_9829 | 21253                 | 1                  | 12273                         | 797                | 797                | 797                | hypothetical protein      |
| group_9830 | 21252                 | 1                  | 12274                         | 1046               | 1046               | 1046               | Tyrosine recombinase XerD |
| group_9831 | 21251                 | 1                  | 12275                         | 788                | 788                | 788                | hypothetical protein      |
| group_9832 | 21250                 | 1                  | 12276                         | 608                | 608                | 608                | hypothetical protein      |
| group_9833 | 21249                 | 1                  | 12277                         | 200                | 200                | 200                | hypothetical protein      |
| group_9834 | 21248                 | 1                  | 12278                         | 146                | 146                | 146                | hypothetical protein      |
| group_9835 | 21247                 | 1                  | 12279                         | 539                | 539                | 539                | hypothetical protein      |
| group_9836 | 13780                 | 1                  | 12033                         | 506                | 506                | 506                | hypothetical protein      |
| group_9837 | 17705                 | 1                  | 12034                         | 284                | 284                | 284                | hypothetical protein      |

|            |       |   |       |      |      |      |                                                                               |
|------------|-------|---|-------|------|------|------|-------------------------------------------------------------------------------|
| group_9838 | 17716 | 1 | 12086 | 428  | 428  | 428  | hypothetical protein                                                          |
| group_9839 | 17715 | 1 | 12125 | 2558 | 2558 | 2558 | hypothetical protein                                                          |
| group_9840 | 17714 | 1 | 12126 | 1514 | 1514 | 1514 | hypothetical protein                                                          |
| group_9841 | 17713 | 1 | 12127 | 170  | 170  | 170  | hypothetical protein                                                          |
| group_9842 | 17712 | 1 | 12128 | 335  | 335  | 335  | hypothetical protein                                                          |
| group_9843 | 17711 | 1 | 12129 | 227  | 227  | 227  | hypothetical protein                                                          |
| group_9844 | 17710 | 1 | 12130 | 482  | 482  | 482  | hypothetical protein                                                          |
| group_9845 | 17709 | 1 | 12131 | 1028 | 1028 | 1028 | hypothetical protein                                                          |
| group_9846 | 17707 | 1 | 12133 | 857  | 857  | 857  | hypothetical protein                                                          |
| group_9847 | 17706 | 1 | 12134 | 1004 | 1004 | 1004 | hypothetical protein                                                          |
| group_9848 | 13875 | 1 | 12160 | 230  | 230  | 230  | hypothetical protein                                                          |
| group_9850 | 20503 | 1 | 13910 | 302  | 302  | 302  | hypothetical protein                                                          |
| group_9862 | 10726 | 1 | 8974  | 968  | 968  | 968  | ECA polysaccharide chain length modulation protein                            |
| group_9863 | 10725 | 1 | 8973  | 1025 | 1025 | 1025 | tRNA 5-methylaminomethyl-2-thiouridine biosynthesis bifunctional protein MnmC |
| group_9864 | 15472 | 1 | 8972  | 659  | 659  | 659  | hypothetical protein                                                          |
| group_9865 | 15473 | 1 | 8971  | 1079 | 1079 | 1079 | hypothetical protein                                                          |
| bshA_1     | 15474 | 1 | 8970  | 1142 | 1142 | 1142 | N-acetyl-alpha-D-glucosaminyl L-malate synthase                               |
| group_9867 | 15475 | 1 | 8969  | 1094 | 1094 | 1094 | hypothetical protein                                                          |
| tuaB       | 15476 | 1 | 8968  | 1430 | 1430 | 1430 | Teichuronic acid biosynthesis protein TuaB                                    |
| group_9869 | 15477 | 1 | 8967  | 776  | 776  | 776  | hypothetical protein                                                          |
| group_9870 | 15478 | 1 | 7407  | 905  | 905  | 905  | hypothetical protein                                                          |
| tuaG       | 15479 | 1 | 7408  | 758  | 758  | 758  | Putative teichuronic acid biosynthesis glycosyltransferase TuaG               |
| gnu        | 15480 | 1 | 7409  | 923  | 923  | 923  | N-acetyl-alpha-D-glucosaminyl-                                                |



|            |       |    |       |      |      |      |                                                       |
|------------|-------|----|-------|------|------|------|-------------------------------------------------------|
|            |       |    |       |      |      |      | diphospho-ditrans,octakis-undecaprenol<br>4-epimerase |
| group_9873 | 15481 | 1  | 7410  | 548  | 548  | 548  | putative sugar transferase EpsL                       |
| group_9874 | 3441  | 1  | 14271 | 752  | 752  | 752  | hypothetical protein                                  |
| group_9883 | 14859 | 90 | 15    | 1535 | 1535 | 1535 | putative type I restriction enzyme P M<br>protein     |
| group_9884 | 14860 | 90 | 14    | 1283 | 1283 | 1283 | hypothetical protein                                  |
| group_9885 | 14861 | 90 | 13    | 2855 | 2855 | 2855 | Type-1 restriction enzyme R protein                   |
| group_9886 | 14862 | 90 | 12    | 722  | 722  | 722  | hypothetical protein                                  |
| group_9887 | 14863 | 90 | 11    | 521  | 521  | 521  | hypothetical protein                                  |
| tnpR_2     | 14864 | 90 | 10    | 569  | 569  | 569  | Transposon gamma-delta resolvase                      |
| group_9889 | 14865 | 90 | 9     | 251  | 251  | 251  | hypothetical protein                                  |
| group_9890 | 14866 | 90 | 8     | 473  | 473  | 473  | hypothetical protein                                  |
| group_9891 | 14867 | 90 | 7     | 203  | 203  | 203  | hypothetical protein                                  |
| group_9892 | 14868 | 90 | 6     | 419  | 419  | 419  | hypothetical protein                                  |
| group_9893 | 14869 | 90 | 5     | 167  | 167  | 167  | hypothetical protein                                  |
| group_9894 | 14870 | 90 | 4     | 251  | 251  | 251  | hypothetical protein                                  |
| group_9895 | 14871 | 90 | 3     | 1160 | 1160 | 1160 | hypothetical protein                                  |
| group_9911 | 4558  | 1  | 15186 | 1508 | 1508 | 1508 | Tyrosine recombinase XerC                             |
| group_9912 | 4557  | 1  | 15187 | 3842 | 3842 | 3842 | hypothetical protein                                  |
| group_9913 | 4556  | 1  | 15188 | 617  | 617  | 617  | hypothetical protein                                  |
| group_9914 | 4555  | 1  | 15189 | 545  | 545  | 545  | hypothetical protein                                  |
| group_9915 | 4554  | 1  | 15190 | 2423 | 2423 | 2423 | ATP-dependent RecD-like DNA helicase                  |
| group_9916 | 763   | 1  | 15185 | 824  | 824  | 824  | hypothetical protein                                  |
| group_9917 | 764   | 1  | 15184 | 2216 | 2216 | 2216 | hypothetical protein                                  |
| group_9918 | 762   | 1  | 5506  | 1145 | 1145 | 1145 | hypothetical protein                                  |
| group_9919 | 761   | 1  | 5505  | 167  | 167  | 167  | hypothetical protein                                  |
| group_9920 | 760   | 1  | 5504  | 488  | 488  | 488  | hypothetical protein                                  |
| nrdG_2     | 759   | 1  | 5503  | 467  | 467  | 467  | Anaerobic ribonucleoside-triphosphate                 |

|            |       |   |       |      |      |      |                                                                                 |
|------------|-------|---|-------|------|------|------|---------------------------------------------------------------------------------|
| nrdD_2     | 758   | 1 | 5502  | 2141 | 2141 | 2141 | reductase-activating protein<br>Anaerobic ribonucleoside-triphosphate reductase |
| nrdD_3     | 4553  | 1 | 5501  | 1079 | 1079 | 1079 | Anaerobic ribonucleoside-triphosphate reductase                                 |
| group_9955 | 9239  | 1 | 8477  | 761  | 761  | 761  | hypothetical protein                                                            |
| group_9956 | 9211  | 1 | 8476  | 434  | 434  | 434  | hypothetical protein                                                            |
| group_9959 | 10331 | 1 | 13593 | 1067 | 1067 | 1067 | hypothetical protein                                                            |
| group_9960 | 10356 | 1 | 13619 | 1661 | 1661 | 1661 | Glycine betaine/proline/choline transporter                                     |
| group_9961 | 10487 | 1 | 13625 | 500  | 500  | 500  | hypothetical protein                                                            |
| group_9964 | 12635 | 1 | 1339  | 1187 | 1187 | 1187 | hypothetical protein                                                            |
| group_9965 | 4442  | 1 | 11768 | 122  | 122  | 122  | hypothetical protein                                                            |
| group_9967 | 4453  | 1 | 1347  | 599  | 599  | 599  | hypothetical protein                                                            |
| group_9978 | 8372  | 1 | 4474  | 1511 | 1511 | 1511 | hypothetical protein                                                            |

61  
62  
63  
64  
65  
66  
67

**Table S6** Unique gene clusters present in Group 3 strains, Va193, Va189, Va196, Va69, Va197, Va177, Va198.

| Gene        | Order within Fragment | Accessory Fragment | Accessory Order with Fragment | Min group size nuc | Max group size nuc | Avg group size nuc | Annotation           |
|-------------|-----------------------|--------------------|-------------------------------|--------------------|--------------------|--------------------|----------------------|
| group_11671 | 770                   | 1                  | 6231                          | 680                | 680                | 680                | hypothetical protein |
| group_11672 | 769                   | 1                  | 6230                          | 1370               | 1370               | 1370               | hypothetical protein |
| group_11674 | 18712                 | 1                  | 396                           | 857                | 857                | 857                | hypothetical protein |

|             |       |     |       |      |      |      |                                                                                          |
|-------------|-------|-----|-------|------|------|------|------------------------------------------------------------------------------------------|
| group_11675 | 18713 | 1   | 395   | 695  | 695  | 695  | hypothetical protein                                                                     |
| group_11676 | 18714 | 1   | 394   | 995  | 995  | 995  | hypothetical protein                                                                     |
| group_11677 | 18715 | 1   | 393   | 923  | 923  | 923  | hypothetical protein                                                                     |
| group_11678 | 18716 | 1   | 445   | 632  | 632  | 632  | hypothetical protein                                                                     |
| group_11679 | 18717 | 1   | 446   | 608  | 608  | 608  | hypothetical protein                                                                     |
| group_11681 | 4216  | 1   | 10619 | 278  | 278  | 278  | hypothetical protein                                                                     |
| group_11682 | 4217  | 1   | 10620 | 254  | 254  | 254  | hypothetical protein                                                                     |
| group_11686 | 22284 | 1   | 10669 | 155  | 155  | 155  | hypothetical protein                                                                     |
| group_11687 | 22285 | 1   | 10668 | 1766 | 1766 | 1766 | DNA replication and repair protein RecF                                                  |
| group_11688 | 22286 | 1   | 3815  | 185  | 185  | 185  | hypothetical protein                                                                     |
| group_11690 | 13806 | 1   | 12338 | 239  | 239  | 239  | hypothetical protein                                                                     |
| engB_1      | 13940 | 1   | 11987 | 3341 | 3341 | 3341 | GTP-binding protein EngB                                                                 |
| group_11696 | 13939 | 1   | 11986 | 176  | 176  | 176  | hypothetical protein                                                                     |
| group_11697 | 13938 | 1   | 11985 | 1067 | 1067 | 1067 | Tyrosine recombinase XerC                                                                |
| epsL_1      | 15291 | 1   | 9381  | 635  | 635  | 635  | putative sugar transferase EpsL                                                          |
| group_11700 | 15290 | 1   | 9380  | 1133 | 1133 | 1133 | N-acetyl-alpha-D-glucosaminyl L-malate synthase                                          |
| group_11701 | 15289 | 1   | 9379  | 578  | 578  | 578  | Galactoside O-acetyltransferase                                                          |
| pimB        | 15288 | 1   | 9378  | 1142 | 1142 | 1142 | GDP-mannose-dependent alpha-(1-6)-phosphatidylinositol monomannoside mannosyltransferase |
| group_11703 | 15287 | 1   | 9377  | 1142 | 1142 | 1142 | hypothetical protein                                                                     |
| group_11704 | 15286 | 1   | 9376  | 1238 | 1238 | 1238 | hypothetical protein                                                                     |
| group_11705 | 15285 | 1   | 9375  | 1310 | 1310 | 1310 | hypothetical protein                                                                     |
| group_11706 | 15284 | 1   | 9374  | 1256 | 1256 | 1256 | hypothetical protein                                                                     |
| group_11707 | 15253 | 1   | 9300  | 1028 | 1028 | 1028 | UDP-N-acetylglucosamine 4-epimerase                                                      |
| group_11720 | 11731 | 454 | 1     | 1202 | 1202 | 1202 | Tyrosine recombinase XerC                                                                |
| group_11721 | 11730 | 454 | 2     | 1703 | 1703 | 1703 | hypothetical protein                                                                     |
| group_11722 | 11729 | 454 | 3     | 2087 | 2087 | 2087 | hypothetical protein                                                                     |

|             |       |     |       |      |      |      |                                                |
|-------------|-------|-----|-------|------|------|------|------------------------------------------------|
| group_11723 | 11738 | 454 | 4     | 437  | 437  | 437  | hypothetical protein                           |
| group_11724 | 11739 | 454 | 5     | 464  | 464  | 464  | hypothetical protein                           |
| group_11725 | 11740 | 454 | 6     | 1691 | 1691 | 1691 | hypothetical protein                           |
| group_11726 | 11741 | 454 | 7     | 1298 | 1298 | 1298 | Cyclic GMP-AMP synthase                        |
| group_11727 | 11742 | 454 | 8     | 1067 | 1067 | 1067 | hypothetical protein                           |
| group_11728 | 11743 | 454 | 17    | 419  | 419  | 419  | hypothetical protein                           |
| group_11729 | 11744 | 454 | 16    | 248  | 248  | 248  | hypothetical protein                           |
| group_11730 | 11745 | 454 | 15    | 545  | 545  | 545  | hypothetical protein                           |
| group_11731 | 11746 | 454 | 14    | 1085 | 1085 | 1085 | hypothetical protein                           |
| group_11732 | 11747 | 454 | 13    | 1379 | 1379 | 1379 | hypothetical protein                           |
| group_11733 | 11748 | 454 | 12    | 524  | 524  | 524  | Transcriptional regulator VspR                 |
| group_11734 | 11749 | 454 | 11    | 332  | 332  | 332  | hypothetical protein                           |
| group_11735 | 11750 | 454 | 10    | 203  | 203  | 203  | hypothetical protein                           |
| tadA_3      | 11751 | 454 | 9     | 1652 | 1652 | 1652 | tRNA-specific adenosine deaminase              |
| group_11737 | 1513  | 1   | 3572  | 491  | 491  | 491  | hypothetical protein                           |
| group_11738 | 1852  | 1   | 2155  | 386  | 386  | 386  | hypothetical protein                           |
| group_11743 | 692   | 1   | 3209  | 419  | 419  | 419  | hypothetical protein                           |
| group_11752 | 1629  | 1   | 14846 | 596  | 596  | 596  | hypothetical protein                           |
| group_11753 | 1628  | 1   | 14845 | 950  | 950  | 950  | hypothetical protein                           |
| group_11754 | 1627  | 1   | 14706 | 620  | 620  | 620  | hypothetical protein                           |
| group_11755 | 1626  | 1   | 14707 | 971  | 971  | 971  | hypothetical protein                           |
| group_11759 | 922   | 1   | 6553  | 1154 | 1154 | 1154 | hypothetical protein                           |
| group_11760 | 921   | 1   | 6552  | 1538 | 1538 | 1538 | putative type I restriction enzyme P M protein |
| group_11761 | 475   | 1   | 6551  | 2390 | 2390 | 2390 | Putative DNA repair helicase RadD              |
| group_11762 | 476   | 1   | 6550  | 197  | 197  | 197  | hypothetical protein                           |
| group_11774 | 9253  | 1   | 8435  | 452  | 452  | 452  | Type II secretion system protein G             |
| group_11775 | 8941  | 1   | 8146  | 431  | 431  | 431  | hypothetical protein                           |
| group_11778 | 6469  | 1   | 8130  | 1235 | 1235 | 1235 | hypothetical protein                           |

|             |       |     |       |      |      |      |                                               |
|-------------|-------|-----|-------|------|------|------|-----------------------------------------------|
| group_11779 | 99    | 1   | 8129  | 521  | 521  | 521  | hypothetical protein                          |
| group_11780 | 100   | 1   | 8128  | 1997 | 1997 | 1997 | hypothetical protein                          |
| group_11781 | 101   | 1   | 8127  | 707  | 707  | 707  | hypothetical protein                          |
| lspA_2      | 48    | 1   | 3752  | 506  | 506  | 506  | Lipoprotein signal peptidase                  |
| group_11799 | 12946 | 1   | 7780  | 2150 | 2150 | 2150 | hypothetical protein                          |
| group_11804 | 12945 | 1   | 7769  | 3164 | 3164 | 3164 | Type I restriction enzyme EcoR124II R protein |
| group_11805 | 12944 | 1   | 7768  | 1154 | 1154 | 1154 | hypothetical protein                          |
| group_11806 | 12943 | 1   | 7767  | 704  | 704  | 704  | hypothetical protein                          |
| hsdM        | 12942 | 1   | 7766  | 1715 | 1715 | 1715 | Type I restriction enzyme EcoKI M protein     |
| group_11808 | 12941 | 1   | 7765  | 950  | 950  | 950  | hypothetical protein                          |
| group_11822 | 3475  | 1   | 3045  | 560  | 560  | 560  | hypothetical protein                          |
| group_11823 | 283   | 1   | 10269 | 536  | 536  | 536  | hypothetical protein                          |
| group_11824 | 284   | 1   | 10268 | 311  | 311  | 311  | hypothetical protein                          |
| group_11825 | 285   | 1   | 3805  | 416  | 416  | 416  | hypothetical protein                          |
| group_11826 | 3799  | 1   | 5321  | 1109 | 1109 | 1109 | hypothetical protein                          |
| group_11829 | 3802  | 1   | 3615  | 620  | 620  | 620  | hypothetical protein                          |
| group_11834 | 22268 | 1   | 3856  | 455  | 455  | 455  | hypothetical protein                          |
| bcr_3       | 22269 | 1   | 3857  | 1214 | 1214 | 1214 | Bicyclomycin resistance protein               |
| cynR_5      | 22270 | 1   | 3858  | 305  | 305  | 305  | HTH-type transcriptional regulator CynR       |
| tetR_2      | 1     | 489 | 2     | 602  | 602  | 602  | Tetracycline repressor protein class D        |
| tetA        | 2     | 489 | 1     | 1202 | 1202 | 1202 | Tetracycline resistance protein, class B      |
| group_11840 | 1972  | 1   | 14334 | 446  | 446  | 446  | hypothetical protein                          |
| dfrA        | 1     | 490 | 1     | 506  | 506  | 506  | Dihydrofolate reductase                       |

68 **Table S7 and S8 in Excel file “Supplementary Table S7.xlsx” and “Supplementary Table**  
69 **S8.xlsx”.**
